# Supplementary material
Source: publisher site journal article supplement (https://www.e-cmh.org/upload/media/cmh-2022-0316-Supplementary-Fig-14.pdf)
Supplement: Supplementary file 1 [file cmh-2022-0316-Supplementary-Fig-14.pdf]

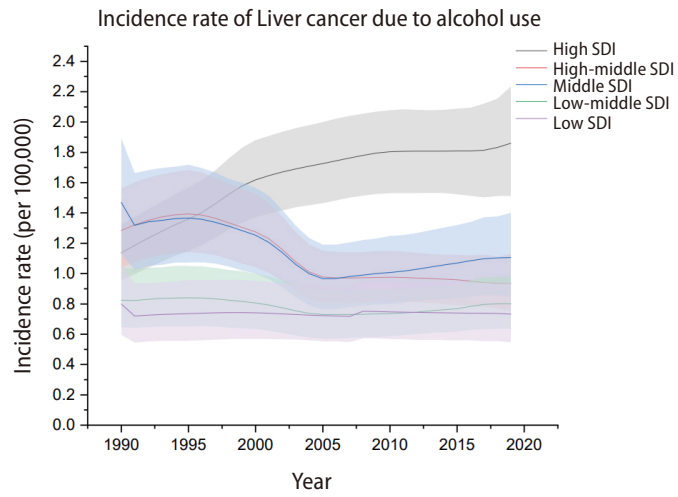

**Supplementary Figure 14.** Age-standardized incidence rates of liver cancer due to alcohol consumption at the SDI regional level from 1990 to 2019. SDI, sociodemographic index.
